# Supplementary material for: Identification of an Endoglin Variant Associated With HCV-Related Liver Fibrosis Progression by Next-Generation Sequencing
Source: PubMed Central journal article supplement (PMC6844190; doi:10.3389/fgene.2019.01024), 2019-11-04
Supplement: DataSheet_1.pdf [file DataSheet_1.pdf]

## *Supplementary Material*

### **1 Supplementary Figures**

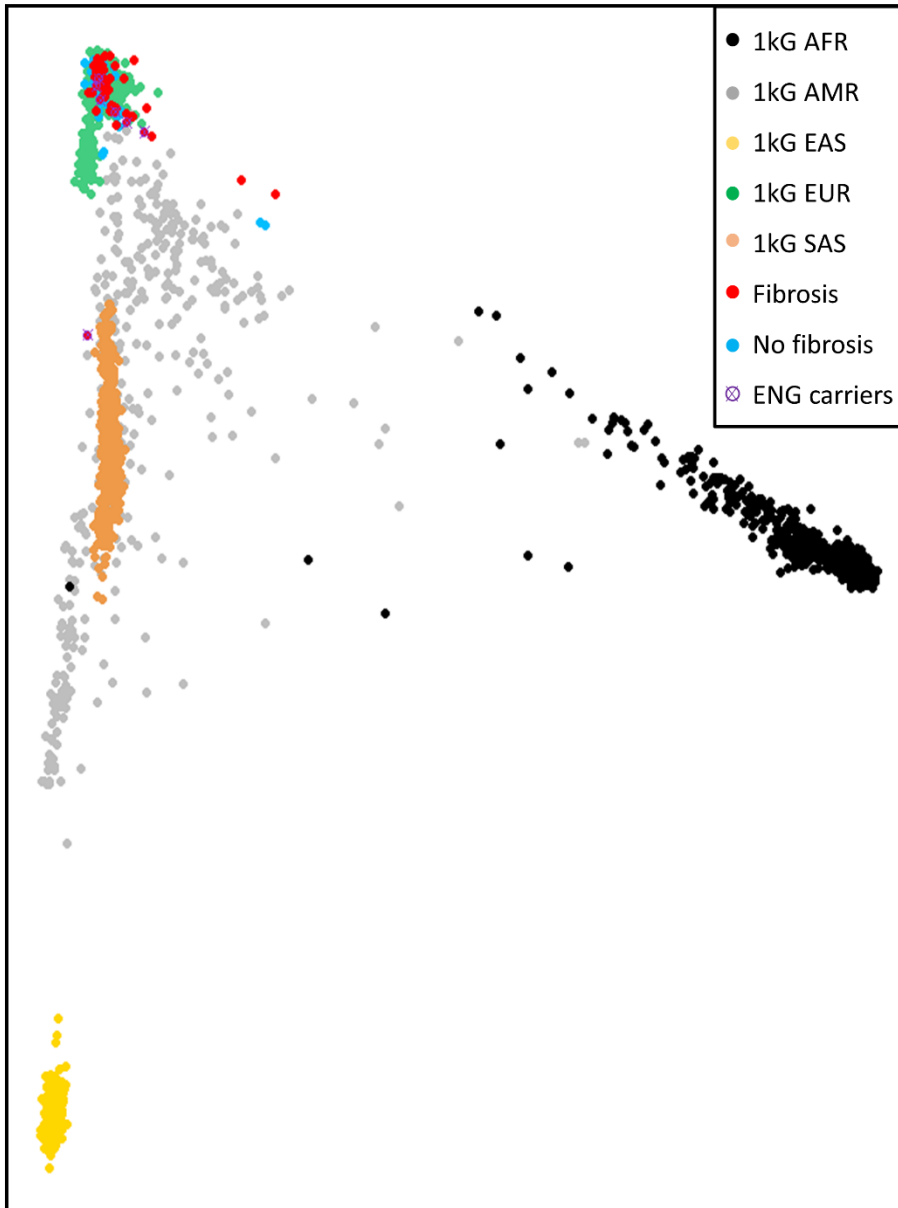

**Supplementary Figure 1. Assessment of population structure in the discovery cohort by Principal Component Analysis (PCA) using 1000 Genomes (1kG) Project phase 3 populations**

PCA was performed with Plink v1.9 software on Whole-Exome Sequencing data and 1000 Genomes (1kG) Project phase 3 public database as reference, selecting good quality variants (after filtering) with a minor allele frequency > 0.02 and a call rate > 0.95 (Belkadi et al., 2016). 1000 Genomes populations were classified into 4 groups: African (AFR, i.e. YRI, LWK, ASW), American (AMR, i.e. MXL, CLM, and PUR), East Asian (CHB, JPT and CHS) and European (CEU, TSI, GBR, FIN, IBS) populations. Our sample of patients with severe fibrosis (in red) and without fibrosis (in light blue) is mainly of European ancestry, except 5 patients. Four were of North African origin (2 cases and 2 controls) and one was very likely of mixed European and Asian origin.

## 2 **Supplementary Tables**

**Supplementary table 1. List of the 707 autosomal genes connected to the 7 main core genes of the TGF- $\beta$  pathway at a degree of connectivity of 1.**

| Target genes | Chr | Gene name                                                | Main core genes of TGF- $\beta$ pathway (a) |        |        |       |       |       | Total of core genes (b) |
|--------------|-----|----------------------------------------------------------|---------------------------------------------|--------|--------|-------|-------|-------|-------------------------|
|              |     |                                                          | TGFB1                                       | TGFBR1 | TGFBR2 | SMAD2 | SMAD3 | SMAD4 |                         |
| N=707        |     |                                                          |                                             |        |        |       |       |       |                         |
| A2M          | 12  | alpha-2-macroglobulin                                    | X                                           |        |        |       |       |       | 1                       |
| ACTA1        | 1   | actin, alpha 1, skeletal muscle                          | X                                           |        |        |       |       |       | 1                       |
| ACTA2        | 10  | actin, alpha 2, smooth muscle, aorta                     | X                                           |        |        |       |       |       | 1                       |
| ACTB         | 7   | actin beta                                               |                                             |        |        |       | X     |       | 1                       |
| ACTN1        | 14  | actinin alpha 1                                          | X                                           |        |        |       |       |       | 1                       |
| ACTN2        | 1   | actinin alpha 2                                          | X                                           |        |        |       |       |       | 1                       |
| ACTN4        | 19  | actinin alpha 4                                          | X                                           |        |        |       |       |       | 1                       |
| ACTR1B       | 2   | ARP1 actin related protein 1 homolog B                   |                                             |        |        | X     |       |       | 1                       |
| ACVR1        | 2   | activin A receptor type 1                                |                                             | X      |        |       |       |       | 1                       |
| ACVR1C       | 2   | activin A receptor type 1C                               |                                             | X      |        |       | X     |       | 2                       |
| ACVR2A       | 2   | activin A receptor type 2A                               |                                             |        |        |       |       | X     | 1                       |
| ACVR2B       | 3   | activin A receptor type 2B                               |                                             |        |        | X     |       | X     | 2                       |
| ACVRL1       | 12  | activin A receptor like type 1                           | X                                           | X      |        |       |       |       | 2                       |
| ADAMTS3      | 4   | ADAM metallopeptidase with thrombospondin type 1 motif 3 | X                                           |        |        |       |       |       | 1                       |
| ADAMTS4      | 1   | ADAM metallopeptidase with thrombospondin type 1 motif 4 | X                                           |        |        |       |       |       | 1                       |
| ADH1A        | 4   | alcohol dehydrogenase 1A (class I), alpha polypeptide    |                                             |        |        |       |       | X     | 1                       |
| AGL          | 1   | amylo-alpha-1, 6-glucosidase, 4-alpha-glucanotransferase |                                             |        |        |       | X     |       | 1                       |
| AKT1         | 14  | AKT serine/threonine kinase 1                            | X                                           | X      |        | X     | X     | X     | 6                       |
| ALB          | 4   | albumin                                                  | X                                           |        |        |       |       | X     | 2                       |
| ALDOA        | 16  | aldolase, fructose-bisphosphate A                        | X                                           |        |        |       |       |       | 1                       |
| ALYREF       | 17  | Aly/REF export factor                                    |                                             |        |        |       | X     |       | 1                       |

|          |    |                                                  |   |   |   |   |   |   |   |   |
|----------|----|--------------------------------------------------|---|---|---|---|---|---|---|---|
| ANAPC10  | 4  | anaphase promoting complex subunit 10            |   |   |   | X | X |   |   | 2 |
| ANGPT1   | 8  | angiopoietin 1                                   | X |   |   |   |   |   |   | 1 |
| ANK1     | 8  | ankyrin 1                                        |   | X |   |   |   |   |   | 1 |
| ANXA2    | 15 | annexin A2                                       | X |   |   |   |   |   |   | 1 |
| AP2B1    | 17 | adaptor related protein complex 2 beta 1 subunit |   | X | X |   |   |   |   | 2 |
| APOE     | 19 | apolipoprotein E                                 | X |   |   |   |   |   |   | 1 |
| APP      | 21 | amyloid beta precursor protein                   | X |   |   |   |   |   |   | 1 |
| ARHGEF18 | 19 | Rho/Rac guanine nucleotide exchange factor 18    | X | X | X |   |   |   |   | 3 |
| ARID1A   | 1  | AT-rich interaction domain 1A                    |   |   |   | X | X |   |   | 2 |
| ARID1B   | 6  | AT-rich interaction domain 1B                    |   |   |   | X |   |   |   | 1 |
| ARNT     | 1  | aryl hydrocarbon receptor nuclear translocator   |   |   |   |   | X | X |   | 2 |
| ASCL1    | 12 | achaete-scute family bHLH transcription factor 1 |   |   |   |   |   | X |   | 1 |
| ASPN     | 9  | asporin                                          |   |   |   |   | X |   |   | 1 |
| ATAD3B   | 1  | ATPase family, AAA domain containing 3B          |   |   |   | X |   |   |   | 1 |
| ATF2     | 2  | activating transcription factor 2                |   |   |   |   | X | X |   | 2 |
| ATF3     | 1  | activating transcription factor 3                |   |   |   | X | X | X |   | 3 |
| ATM      | 11 | ATM serine/threonine kinase                      |   |   |   |   |   |   | X | 1 |
| AXIN1    | 16 | axin 1                                           |   | X | X |   | X |   | X | 4 |
| AXIN2    | 17 | axin 2                                           |   |   |   |   |   |   | X | 1 |
| BACH1    | 21 | BTB domain and CNC homolog 1                     |   |   |   |   | X |   |   | 1 |
| BAMBI    | 10 | BMP and activin membrane bound inhibitor         | X | X | X |   |   |   | X | 4 |
| BCAR1    | 16 | BCAR1, Cas family scaffolding protein            |   |   |   |   | X |   |   | 1 |
| BCL2     | 18 | BCL2, apoptosis regulator                        | X |   |   |   |   |   |   | 1 |
| BCL6     | 3  | B cell CLL/lymphoma 6                            |   |   |   |   | X | X |   | 2 |

|           |    |                                                               |   |   |   |   |   |   |   |   |
|-----------|----|---------------------------------------------------------------|---|---|---|---|---|---|---|---|
| BGLAP     | 1  | bone gamma-carboxyglutamate protein                           | X |   |   | X |   |   |   | 2 |
| BIRC5     | 17 | baculoviral IAP repeat containing 5                           | X |   |   |   |   |   |   | 1 |
| BLZF1     | 1  | basic leucine zipper nuclear factor 1                         |   |   |   |   | X |   |   | 1 |
| BMP2      | 20 | bone morphogenetic protein 2                                  | X |   |   |   |   | X | X | 3 |
| BMP4      | 14 | bone morphogenetic protein 4                                  |   |   |   |   |   | X | X | 2 |
| BMP5      | 6  | bone morphogenetic protein 5                                  |   | X |   |   |   |   |   | 1 |
| BMP6      | 6  | bone morphogenetic protein 6                                  |   |   |   |   |   |   | X | 1 |
| BMP7      | 20 | bone morphogenetic protein 7                                  |   |   |   |   |   |   | X | 1 |
| BMPR1B    | 4  | bone morphogenetic protein receptor type 1B                   |   |   |   |   |   |   | X | 1 |
| BMPR2     | 2  | bone morphogenetic protein receptor type 2                    |   |   |   | X |   |   | X | 2 |
| BRCA1     | 17 | BRCA1, DNA repair associated                                  |   |   |   |   | X |   |   | 1 |
| BRCA2     | 13 | BRCA2, DNA repair associated                                  |   |   |   |   | X |   |   | 1 |
| BTRC      | 10 | beta-transducin repeat containing E3 ubiquitin protein ligase |   |   |   |   | X | X |   | 2 |
| BUB1      | 2  | BUB1 mitotic checkpoint serine/threonine kinase               |   |   |   | X |   |   |   | 1 |
| C10orf118 | 10 | coiled-coil domain containing 186                             |   |   |   |   | X |   |   | 1 |
| C1orf116  | 1  | chromosome 1 open reading frame 116                           |   |   |   | X | X |   |   | 2 |
| C6orf132  | 6  | chromosome 6 open reading frame 132                           |   |   |   |   |   | X |   | 1 |
| CAMK2A    | 5  | calcium/calmodulin dependent protein kinase II alpha          |   |   |   | X |   |   |   | 1 |
| CAV1      | 7  | caveolin 1                                                    | X | X | X | X | X |   | X | 6 |
| CBFB      | 16 | core-binding factor beta subunit                              |   |   |   |   | X | X |   | 2 |
| CBL       | 11 | Cbl proto-oncogene                                            |   |   | X |   | X |   |   | 2 |
| CCL17     | 16 | C-C motif chemokine ligand 17                                 |   |   |   |   |   |   | X | 1 |
| CCL2      | 17 | C-C motif chemokine ligand 2                                  | X |   |   |   |   |   |   | 1 |
| CCNB1     | 5  | cyclin B1                                                     |   |   | X |   |   |   |   | 1 |

|        |    |                                      |   |   |   |   |   |   |   |   |
|--------|----|--------------------------------------|---|---|---|---|---|---|---|---|
| CCNB2  | 15 | cyclin B2                            |   |   | X |   |   |   |   | 1 |
| CCND1  | 11 | cyclin D1                            |   |   | X |   |   | X |   | 2 |
| CCNG2  | 4  | cyclin G2                            |   |   |   | X | X | X |   | 3 |
| CCNH   | 5  | cyclin H                             |   | X | X |   |   |   |   | 2 |
| CCNT1  | 12 | cyclin T1                            |   | X | X |   |   |   |   | 2 |
| CD209  | 19 | CD209 molecule                       | X |   |   |   |   |   |   | 1 |
| CD226  | 18 | CD226 molecule                       | X |   |   |   |   |   |   | 1 |
| CD44   | 11 | CD44 molecule (Indian blood group)   |   | X |   |   |   |   |   | 1 |
| CDC16  | 13 | cell division cycle 16               |   |   |   | X | X |   |   | 2 |
| CDC25A | 3  | cell division cycle 25A              |   |   |   |   | X | X |   | 2 |
| CDC27  | 17 | cell division cycle 27               |   |   |   | X | X |   |   | 2 |
| CDC7   | 1  | cell division cycle 7                |   |   |   |   | X |   |   | 1 |
| CDH1   | 16 | cadherin 1                           | X |   |   | X | X | X | X | 5 |
| CDH2   | 18 | cadherin 2                           | X |   |   |   |   |   | X | 2 |
| CDK2   | 12 | cyclin dependent kinase 2            |   |   |   | X | X | X |   | 3 |
| CDK4   | 12 | cyclin dependent kinase 4            |   |   |   |   | X | X |   | 2 |
| CDK7   | 5  | cyclin dependent kinase 7            |   | X | X |   |   |   |   | 2 |
| CDK8   | 13 | cyclin dependent kinase 8            |   |   |   |   | X |   |   | 1 |
| CDK9   | 9  | cyclin dependent kinase 9            |   | X | X |   |   |   |   | 2 |
| CDKN1A | 6  | cyclin dependent kinase inhibitor 1A | X |   |   | X | X | X | X | 5 |
| CDKN1B | 12 | cyclin dependent kinase inhibitor 1B | X |   |   |   | X | X |   | 3 |
| CDKN2A | 9  | cyclin dependent kinase inhibitor 2A |   |   |   |   | X | X |   | 2 |
| CDKN2B | 9  | cyclin dependent kinase inhibitor 2B | X |   |   | X | X | X |   | 4 |
| CDX1   | 5  | caudal type homeobox 1               |   |   |   |   | X |   |   | 1 |
| CEBPA  | 19 | CCAAT/enhancer binding protein alpha | X |   |   |   | X | X |   | 3 |

|         |    |                                                                                 |   |   |   |   |   |   |   |   |
|---------|----|---------------------------------------------------------------------------------|---|---|---|---|---|---|---|---|
| CEBPB   | 20 | CCAAT/enhancer binding protein beta                                             |   |   |   | X | X | X |   | 3 |
| CEBPD   | 8  | CCAAT/enhancer binding protein delta                                            |   |   |   |   | X | X |   | 2 |
| CELF1   | 11 | CUGBP Elav-like family member 1                                                 |   |   |   |   |   |   | X | 1 |
| CFD     | 19 | complement factor D                                                             | X |   |   |   |   |   |   | 1 |
| CGN     | 1  | cingulin                                                                        | X | X | X |   |   |   |   | 3 |
| CHUK    | 10 | conserved helix-loop-helix ubiquitous kinase                                    |   | X | X | X | X |   |   | 4 |
| CIITA   | 16 | class II major histocompatibility complex transactivator                        |   |   |   |   |   | X |   | 1 |
| CITED2  | 6  | Cbp/p300 interacting transactivator with Glu/Asp rich carboxy-terminal domain 2 |   |   |   | X | X |   |   | 2 |
| CLDN7   | 17 | claudin 7                                                                       |   |   |   |   |   | X |   | 1 |
| CLU     | 8  | clusterin                                                                       | X | X | X |   |   |   |   | 3 |
| COL1A2  | 7  | collagen type I alpha 2 chain                                                   |   |   |   |   | X | X |   | 2 |
| COL2A1  | 12 | collagen type II alpha 1 chain                                                  | X |   |   |   |   |   |   | 1 |
| COPS5   | 8  | COP9 signalosome subunit 5                                                      |   |   |   |   |   | X |   | 1 |
| CREB1   | 2  | cAMP responsive element binding protein 1                                       | X |   |   |   | X |   |   | 2 |
| CREBBP  | 16 | CREB binding protein                                                            |   |   |   | X | X | X |   | 3 |
| CRK     | 17 | CRK proto-oncogene, adaptor protein                                             |   |   |   |   | X |   |   | 1 |
| CSF2    | 5  | colony stimulating factor 2                                                     |   |   |   |   |   |   | X | 1 |
| CSNK1D  | 17 | casein kinase 1 delta                                                           |   |   |   | X | X | X |   | 3 |
| CSNK1G2 | 19 | casein kinase 1 gamma 2                                                         |   |   |   |   | X |   |   | 1 |
| CSRP2   | 12 | cysteine and glycine rich protein 2                                             | X |   |   |   |   |   |   | 1 |
| CTBP1   | 4  | C-terminal binding protein 1                                                    |   |   |   | X |   | X |   | 2 |
| CTCF    | 16 | CCCTC-binding factor                                                            |   |   |   |   | X | X |   | 2 |
| CTDSP1  | 2  | CTD small phosphatase 1                                                         |   |   |   | X | X |   |   | 2 |
| CTDSP2  | 12 | CTD small phosphatase 2                                                         |   |   |   | X | X |   |   | 2 |



|         |    |                                                |   |   |   |   |   |   |   |   |   |
|---------|----|------------------------------------------------|---|---|---|---|---|---|---|---|---|
| CTDSPL  | 3  | CTD small phosphatase like                     |   |   |   | X | X |   |   |   | 2 |
| CTGF    | 6  | connective tissue growth factor                | X | X | X | X | X | X | X | X | 7 |
| CTNNB1  | 3  | catenin beta 1                                 |   | X | X | X | X | X | X | X | 6 |
| CUL1    | 7  | cullin 1                                       |   |   |   | X | X |   |   |   | 2 |
| CXCL12  | 10 | C-X-C motif chemokine ligand 12                |   |   |   |   | X |   |   |   | 1 |
| CYLD    | 16 | CYLD lysine 63 deubiquitinase                  |   |   |   |   |   |   |   | X | 1 |
| CYP17A1 | 10 | cytochrome P450 family 17 subfamily A member 1 | X |   |   |   |   |   |   |   | 1 |
| CYP19A1 | 15 | cytochrome P450 family 19 subfamily A member 1 |   |   |   |   | X |   |   |   | 1 |
| CYR61   | 1  | cysteine rich angiogenic inducer 61            | X |   |   |   |   |   |   |   | 1 |
| DAB2    | 5  | DAB2, clathrin adaptor protein                 |   | X | X | X | X |   |   |   | 4 |
| DACH1   | 13 | dachshund family transcription factor 1        |   |   |   |   |   |   | X |   | 1 |
| DAXX    | 6  | death domain associated protein                | X |   | X | X |   |   | X |   | 4 |
| DCAF7   | 17 | DDB1 and CUL4 associated factor 7              |   |   |   |   | X |   |   |   | 1 |
| DCN     | 12 | decorin                                        | X |   |   |   |   |   |   |   | 1 |
| DDX5    | 17 | DEAD-box helicase 5                            |   |   |   |   | X |   |   |   | 1 |
| DEDD    | 1  | death effector domain containing               |   |   |   |   | X |   |   |   | 1 |
| DEPTOR  | 8  | DEP domain containing MTOR interacting protein |   |   |   |   | X |   |   |   | 1 |
| DIO3    | 14 | iodothyronine deiodinase 3                     |   |   |   |   |   |   | X |   | 1 |
| DKK1    | 10 | dickkopf WNT signaling pathway inhibitor 1     | X |   |   |   |   |   |   |   | 1 |
| DLX1    | 2  | distal-less homeobox 1                         |   |   |   |   | X | X |   |   | 2 |
| DOCK9   | 13 | dedicator of cytokinesis 9                     |   |   |   | X | X |   |   |   | 2 |
| DPYSL2  | 8  | dihydropyrimidinase like 2                     |   |   |   |   |   |   | X |   | 1 |
| DRAP1   | 11 | DR1 associated protein 1                       |   |   |   | X | X | X |   |   | 3 |
| DROSHA  | 5  | drosha ribonuclease III                        |   |   |   |   | X |   |   |   | 1 |
| DVL1    | 1  | dishevelled segment polarity protein 1         |   |   |   | X | X | X | X | X | 4 |

|           |    |                                                                     |   |   |   |   |   |   |   |   |   |
|-----------|----|---------------------------------------------------------------------|---|---|---|---|---|---|---|---|---|
| DYNLRB1   | 20 | dynein light chain roadblock-type 1                                 |   | X | X | X |   |   |   |   | 3 |
| E2F4      | 16 | E2F transcription factor 4                                          |   |   |   | X | X | X |   |   | 3 |
| E2F5      | 8  | E2F transcription factor 5                                          |   |   |   | X | X | X |   |   | 3 |
| EBAG9     | 8  | estrogen receptor binding site associated, antigen, 9               |   |   |   |   |   | X |   |   | 1 |
| EDN1      | 6  | endothelin 1                                                        | X |   |   |   |   |   |   |   | 1 |
| EGF       | 4  | epidermal growth factor                                             | X |   |   |   |   |   |   |   | 1 |
| EGR1      | 5  | early growth response 1                                             | X | X |   |   |   |   |   | X | 3 |
| EID2      | 19 | EP300 interacting inhibitor of differentiation 2                    |   |   |   | X | X | X |   |   | 3 |
| EIF2A     | 3  | eukaryotic translation initiation factor 2A                         |   | X | X |   |   |   |   |   | 2 |
| EIF2AK4   | 15 | eukaryotic translation initiation factor 2 alpha kinase 4           |   |   |   |   |   | X |   |   | 1 |
| EIF3I     | 1  | eukaryotic translation initiation factor 3 subunit I                | X |   |   |   |   |   |   |   | 1 |
| EIF4A3    | 17 | eukaryotic translation initiation factor 4A3                        |   |   |   |   |   | X |   |   | 1 |
| EIF4ENIF1 | 22 | eukaryotic translation initiation factor 4E nuclear import factor 1 |   |   |   |   | X |   |   |   | 1 |
| ELAC2     | 17 | elaC ribonuclease Z 2                                               |   |   |   | X | X |   |   |   | 2 |
| ELANE     | 19 | elastase, neutrophil expressed                                      | X |   |   |   |   |   |   |   | 1 |
| ENG       | 9  | endoglin                                                            | X | X | X |   | X | X |   |   | 5 |
| EOMES     | 3  | eomesodermin                                                        | X |   |   |   |   |   |   |   | 1 |
| EP300     | 22 | E1A binding protein p300                                            |   | X |   | X | X | X | X | X | 5 |
| EPAS1     | 2  | endothelial PAS domain protein 1                                    |   |   |   |   |   | X |   |   | 1 |
| EPB41     | 1  | erythrocyte membrane protein band 4.1                               |   |   |   |   |   | X |   |   | 1 |
| EPB41L5   | 2  | erythrocyte membrane protein band 4.1 like 5                        |   |   |   | X | X |   |   |   | 2 |
| EPS15     | 1  | epidermal growth factor receptor pathway substrate 15               | X |   |   |   |   |   |   |   | 1 |

|        |    |                                                             |   |   |   |   |   |   |   |   |
|--------|----|-------------------------------------------------------------|---|---|---|---|---|---|---|---|
| ERBB2  | 17 | erb-b2 receptor tyrosine kinase 2                           |   |   |   |   |   |   | X | 1 |
| ERC1   | 12 | ELKS/RAB6-interacting/CAST family member 1                  |   | X | X |   |   |   |   | 2 |
| ERCC2  | 19 | ERCC excision repair 2, TFIIH core complex helicase subunit |   | X | X |   |   |   |   | 2 |
| ERCC3  | 2  | ERCC excision repair 3, TFIIH core complex helicase subunit |   | X | X |   |   |   |   | 2 |
| ESR1   | 6  | estrogen receptor 1                                         |   |   |   | X | X | X |   | 3 |
| ETV4   | 17 | ETS variant 4                                               |   |   |   | X |   |   |   | 1 |
| F10    | 13 | coagulation factor X                                        |   |   |   | X |   |   |   | 1 |
| F13A1  | 6  | coagulation factor XIII A chain                             | X |   |   |   |   |   |   | 1 |
| F5     | 1  | coagulation factor V                                        | X |   |   |   |   |   |   | 1 |
| FAM83G | 17 | family with sequence similarity 83 member G                 |   |   |   | X | X |   |   | 2 |
| FASLG  | 1  | Fas ligand                                                  | X |   |   |   |   |   |   | 1 |
| FBLN5  | 14 | fibulin 5                                                   | X |   |   |   |   |   |   | 1 |
| FBN1   | 15 | fibrillin 1                                                 | X |   |   |   |   |   |   | 1 |
| FCN1   | 9  | ficolin 1                                                   | X |   |   |   |   |   |   | 1 |
| FGF2   | 4  | fibroblast growth factor 2                                  | X |   |   |   |   |   |   | 1 |
| FGF21  | 19 | fibroblast growth factor 21                                 | X |   |   |   |   |   |   | 1 |
| FHL2   | 2  | four and a half LIM domains 2                               |   |   |   | X | X | X |   | 3 |
| FHL3   | 1  | four and a half LIM domains 3                               |   |   |   | X | X | X |   | 3 |
| FKBP1A | 20 | FK506 binding protein 1A                                    | X | X | X | X | X |   | X | 6 |
| FKBP2  | 11 | FK506 binding protein 2                                     |   |   |   | X |   |   |   | 1 |
| FLI1   | 11 | Fli-1 proto-oncogene, ETS transcription factor              |   |   | X |   |   |   |   | 1 |
| FMOD   | 1  | fibromodulin                                                | X |   |   |   |   |   |   | 1 |
| FN1    | 2  | fibronectin 1                                               | X |   |   |   |   |   |   | 1 |
| FNTA   | 8  | farnesyltransferase, CAAX box, alpha                        | X | X |   |   |   |   |   | 2 |
| FOS    | 14 | Fos proto-oncogene, AP-1 transcription factor subunit       | X |   |   | X | X | X | X | 5 |

|        |    |                                                |   |   |   |   |   |   |   |   |
|--------|----|------------------------------------------------|---|---|---|---|---|---|---|---|
| FOXG1  | 14 | forkhead box G1                                |   |   |   | X | X | X |   | 3 |
| FOXH1  | 8  | forkhead box H1                                |   |   |   | X | X | X |   | 3 |
| FOXL2  | 3  | forkhead box L2                                |   |   |   |   | X |   |   | 1 |
| FOXM1  | 12 | forkhead box M1                                |   |   |   |   | X |   |   | 1 |
| FOXO1  | 13 | forkhead box O1                                |   |   |   | X | X | X |   | 3 |
| FOXO3  | 6  | forkhead box O3                                |   |   |   | X | X | X |   | 3 |
| FOXQ1  | 6  | forkhead box Q1                                | X |   |   |   |   |   |   | 1 |
| FSHR   | 2  | follicle stimulating hormone receptor          | X |   |   |   |   |   |   | 1 |
| FST    | 5  | follistatin                                    | X |   |   |   |   |   |   | 1 |
| FSTL1  | 3  | follistatin like 1                             | X |   |   |   |   |   |   | 1 |
| FURIN  | 15 | furin, paired basic amino acid cleaving enzyme | X |   |   |   |   |   |   | 1 |
| GAS6   | 13 | growth arrest specific 6                       | X |   |   |   |   |   |   | 1 |
| GAST   | 17 | gastrin                                        |   |   |   |   | X |   | X | 2 |
| GATA3  | 10 | GATA binding protein 3                         | X |   |   |   | X | X |   | 3 |
| GATA4  | 8  | GATA binding protein 4                         |   |   |   | X | X |   |   | 2 |
| GATA6  | 18 | GATA binding protein 6                         |   |   |   | X |   |   |   | 1 |
| GDF11  | 12 | growth differentiation factor 11               |   | X |   |   |   |   |   | 1 |
| GDF9   | 5  | growth differentiation factor 9                |   | X |   | X |   |   |   | 2 |
| GJA1   | 6  | gap junction protein alpha 1                   | X |   |   |   |   |   |   | 1 |
| GLI3   | 7  | GLI family zinc finger 3                       |   |   |   |   |   | X |   | 1 |
| GNAQ   | 9  | G protein subunit alpha q                      | X |   |   |   |   |   |   | 1 |
| GPC1   | 2  | glypican 1                                     |   | X | X | X |   |   |   | 3 |
| GRIP1  | 12 | glutamate receptor interacting protein 1       |   |   |   |   |   | X |   | 1 |
| GSC    | 14 | goosecoid homeobox                             |   |   |   | X | X | X |   | 3 |
| GSK3B  | 3  | glycogen synthase kinase 3 beta                |   |   |   |   | X |   |   | 1 |
| GTF2H1 | 11 | general transcription factor IIH subunit 1     |   | X | X |   |   |   |   | 2 |
| GTF2H2 | 5  | general transcription factor IIH subunit 2     |   | X | X |   |   |   |   | 2 |

|        |    |                                                                |   |   |   |   |   |   |   |
|--------|----|----------------------------------------------------------------|---|---|---|---|---|---|---|
| GTF2H3 | 12 | general transcription factor III subunit 3                     | X | X |   |   |   |   | 2 |
| GTF2I  | 7  | general transcription factor III                               |   |   | X |   | X |   | 2 |
| HBZ    | 16 | hemoglobin subunit zeta                                        |   |   |   | X |   |   | 1 |
| HDAC1  | 1  | histone deacetylase 1                                          |   |   | X | X | X | X | 4 |
| HDAC2  | 6  | histone deacetylase 2                                          |   |   | X | X | X | X | 4 |
| HDAC3  | 5  | histone deacetylase 3                                          |   |   |   |   |   | X | 1 |
| HDAC4  | 2  | histone deacetylase 4                                          |   |   |   | X |   |   | 1 |
| HDAC5  | 17 | histone deacetylase 5                                          |   |   |   | X |   | X | 2 |
| HDAC9  | 7  | histone deacetylase 9                                          |   |   |   | X |   |   | 1 |
| HERC5  | 4  | HECT and RLD domain containing E3 ubiquitin protein ligase 5   |   |   |   |   | X |   | 1 |
| HGS    | 17 | hepatocyte growth factor-regulated tyrosine kinase substrate   |   |   | X | X | X |   | 3 |
| HIF1A  | 14 | hypoxia inducible factor 1 alpha subunit                       |   |   |   | X | X |   | 2 |
| HIPK2  | 7  | homeodomain interacting protein kinase 2                       |   |   | X | X |   |   | 2 |
| HIVEP1 | 6  | human immunodeficiency virus type I enhancer binding protein 1 | X |   |   |   |   |   | 1 |
| HMGA2  | 12 | high mobility group AT-hook 2                                  |   |   | X | X | X |   | 3 |
| HMMR   | 5  | hyaluronan mediated motility receptor                          | X |   |   |   |   |   | 1 |
| HMOX1  | 22 | heme oxygenase 1                                               |   |   |   |   |   | X | 1 |
| HNF1A  | 12 | HNF1 homeobox A                                                |   |   |   |   | X |   | 1 |
| HNF4A  | 20 | hepatocyte nuclear factor 4 alpha                              |   |   |   | X | X |   | 2 |
| HOXA13 | 7  | homeobox A13                                                   |   |   | X |   |   |   | 1 |
| HOXA9  | 7  | homeobox A9                                                    |   |   | X |   | X |   | 2 |
| HOXC11 | 12 | homeobox C11                                                   |   |   |   | X |   |   | 1 |
| HOXC8  | 12 | homeobox C8                                                    |   |   |   |   | X |   | 1 |
| HOXD13 | 2  | homeobox D13                                                   |   |   | X |   |   |   | 1 |
| HRG    | 3  | histidine rich glycoprotein                                    | X |   |   |   |   |   | 1 |

|                |    |                                                         |   |   |   |   |   |   |   |   |
|----------------|----|---------------------------------------------------------|---|---|---|---|---|---|---|---|
| HRH1           | 3  | histamine receptor H1                                   |   |   | X | X |   |   | 2 |   |
| HSD17B1        | 17 | hydroxysteroid 17-beta dehydrogenase 1                  | X |   |   |   |   |   | 1 |   |
| HSP90AA1       | 14 | heat shock protein 90 alpha family class A member 1     |   | X | X |   |   |   | 2 |   |
| HSPA4          | 5  | heat shock protein family A (Hsp70) member 4            |   | X |   | X | X |   | 3 |   |
| HSPA8          | 11 | heat shock protein family A (Hsp70) member 8            |   |   |   | X | X | X | 3 |   |
| HSPB1          | 7  | heat shock protein family B (small) member 1            | X |   |   |   |   |   | 1 |   |
| HSPB2-C11orf52 | 11 | HSPB2-C11orf52 readthrough (NMD candidate)              | X |   |   |   |   |   | 1 |   |
| HSPB3          | 5  | heat shock protein family B (small) member 3            | X |   |   |   |   |   | 1 |   |
| HSPG2          | 1  | heparan sulfate proteoglycan 2                          | X |   |   |   |   |   | 1 |   |
| HYAL2          | 3  | hyaluronoglucosaminidase 2                              | X |   |   |   |   |   | 1 |   |
| ICAM1          | 19 | intercellular adhesion molecule 1                       | X |   |   |   |   |   | 1 |   |
| ID1            | 20 | inhibitor of DNA binding 1, HLH protein                 | X |   |   |   |   | X | 2 |   |
| ID2            | 2  | inhibitor of DNA binding 2                              | X |   |   |   |   |   | 1 |   |
| IFNA1          | 9  | interferon alpha 1                                      | X |   |   |   |   |   | 1 |   |
| IFNB1          | 9  | interferon beta 1                                       |   |   |   |   | X | X | 2 |   |
| IFNG           | 12 | interferon gamma                                        | X |   |   |   |   |   | 1 |   |
| IGF1           | 12 | insulin like growth factor 1                            | X |   |   |   |   |   | 1 |   |
| IGF2           | 11 | insulin like growth factor 2                            | X |   |   |   |   |   | 1 |   |
| IGFBP1         | 7  | insulin like growth factor binding protein 1            | X |   |   |   |   |   | 1 |   |
| IGFBP3         | 7  | insulin like growth factor binding protein 3            | X |   |   |   |   |   | 1 |   |
| IKBKB          | 8  | inhibitor of nuclear factor kappa B kinase subunit beta |   | X | X |   |   |   | 2 |   |
| IL10           | 1  | interleukin 10                                          |   |   |   |   | X | X | X | 3 |

|        |    |                                                 |   |   |   |   |  |   |   |   |
|--------|----|-------------------------------------------------|---|---|---|---|--|---|---|---|
| IL13   | 5  | interleukin 13                                  | X |   |   | X |  |   |   | 2 |
| IL17A  | 6  | interleukin 17A                                 | X |   |   |   |  |   |   | 1 |
| IL1A   | 2  | interleukin 1 alpha                             | X |   |   |   |  |   |   | 1 |
| IL1B   | 2  | interleukin 1 beta                              |   |   | X |   |  |   | X | 2 |
| IL2    | 4  | interleukin 2                                   | X |   |   |   |  |   |   | 1 |
| IL25   | 14 | interleukin 25                                  |   |   |   | X |  |   |   | 1 |
| IL36RN | 2  | interleukin 36 receptor antagonist              |   |   |   |   |  | X |   | 1 |
| IL37   | 2  | interleukin 37                                  |   |   |   |   |  | X |   | 1 |
| IL5    | 5  | interleukin 5                                   |   |   |   |   |  | X | X | 2 |
| IL6    | 7  | interleukin 6                                   | X |   |   |   |  |   |   | 1 |
| ING2   | 4  | inhibitor of growth family member 2             |   |   |   | X |  |   |   | 1 |
| INHBA  | 7  | inhibin beta A subunit                          | X |   |   |   |  |   |   | 1 |
| INHBB  | 2  | inhibin beta B subunit                          | X |   |   |   |  |   |   | 1 |
| INHBC  | 12 | inhibin beta C subunit                          | X |   |   |   |  |   |   | 1 |
| INHBE  | 12 | inhibin beta E subunit                          | X |   |   |   |  |   |   | 1 |
| INS    | 11 | insulin                                         | X |   |   |   |  |   | X | 2 |
| INSR   | 19 | insulin receptor                                |   |   |   | X |  |   |   | 1 |
| IPO7   | 11 | importin 7                                      |   |   |   | X |  |   |   | 1 |
| IQGAP1 | 15 | IQ motif containing GTPase activating protein 1 |   |   | X |   |  |   |   | 1 |
| IRAK3  | 12 | interleukin 1 receptor associated kinase 3      | X |   |   |   |  |   |   | 1 |
| IRF3   | 19 | interferon regulatory factor 3                  |   |   |   | X |  |   | X | 2 |
| IRF7   | 11 | interferon regulatory factor 7                  |   |   |   | X |  | X | X | 3 |
| IRX3   | 16 | iroquois homeobox 3                             |   |   |   |   |  | X |   | 1 |
| IRX6   | 16 | iroquois homeobox 6                             |   |   |   |   |  | X |   | 1 |
| ITCH   | 20 | itchy E3 ubiquitin protein ligase               |   | X |   | X |  | X | X | 4 |
| ITGA5  | 12 | integrin subunit alpha 5                        |   | X |   |   |  |   |   | 1 |
| ITGAE  | 17 | integrin subunit alpha E                        | X |   |   |   |  |   |   | 1 |
| ITGAV  | 2  | integrin subunit alpha V                        |   | X | X |   |  |   |   | 2 |

|        |    |                                                        |   |   |   |   |   |   |
|--------|----|--------------------------------------------------------|---|---|---|---|---|---|
| ITGB5  | 3  | integrin subunit beta 5                                |   |   | X | X |   | 2 |
| ITGB8  | 7  | integrin subunit beta 8                                |   | X |   |   |   | 1 |
| JPH1   | 8  | junctional protein 1                                   |   |   | X |   |   | 1 |
| JPH3   | 16 | junctional protein 3                                   |   |   | X |   |   | 1 |
| JUN    | 1  | Jun proto-oncogene, AP-1 transcription factor subunit  | X |   | X | X | X | 5 |
| JUNB   | 19 | JunB proto-oncogene, AP-1 transcription factor subunit |   |   | X | X | X | 3 |
| JUND   | 19 | JunD proto-oncogene, AP-1 transcription factor subunit |   |   |   | X |   | 1 |
| KAT2B  | 3  | lysine acetyltransferase 2B                            |   |   | X | X | X | 4 |
| KDM6B  | 17 | lysine demethylase 6B                                  |   |   | X | X | X | 3 |
| KLC1   | 14 | kinesin light chain 1                                  |   |   |   |   | X | 1 |
| KLF10  | 8  | Kruppel like factor 10                                 | X |   |   |   | X | 2 |
| KLF11  | 2  | Kruppel like factor 11                                 |   |   |   | X | X | 2 |
| KLF2   | 19 | Kruppel like factor 2                                  |   |   | X |   | X | 2 |
| KLF4   | 9  | Kruppel like factor 4                                  |   |   | X |   | X | 2 |
| KLF5   | 13 | Kruppel like factor 5                                  |   |   | X | X | X | 3 |
| KLF6   | 10 | Kruppel like factor 6                                  | X |   |   |   |   | 1 |
| KLHL9  | 9  | kelch like family member 9                             |   |   |   | X |   | 1 |
| KNG1   | 3  | kininogen 1                                            | X |   |   |   |   | 1 |
| KPNB1  | 17 | karyopherin subunit beta 1                             |   |   |   | X | X | 2 |
| KRT10  | 17 | keratin 10                                             |   |   |   | X |   | 1 |
| KRT2   | 12 | keratin 2                                              |   |   |   | X |   | 1 |
| LAMC1  | 1  | laminin subunit gamma 1                                |   |   |   | X | X | 2 |
| LCK    | 1  | LCK proto-oncogene, Src family tyrosine kinase         |   |   | X | X |   | 2 |
| LEF1   | 4  | lymphoid enhancer binding factor 1                     |   |   | X | X | X | 4 |
| LEFTY1 | 1  | left-right determination factor 1                      |   |   |   | X |   | 1 |
| LEFTY2 | 1  | left-right determination factor 2                      | X |   |   |   |   | 1 |
| LEMD3  | 12 | LEM domain containing 3                                |   |   | X |   | X | 2 |



|         |    |                                                                   |   |   |   |   |   |   |   |
|---------|----|-------------------------------------------------------------------|---|---|---|---|---|---|---|
| LEP     | 7  | leptin                                                            |   | X |   |   |   |   | 1 |
| LMNA    | 1  | lamin A/C                                                         |   |   |   |   | X |   | 1 |
| LMO4    | 1  | LIM domain only 4                                                 |   |   |   |   |   | X | 1 |
| LOX     | 5  | lysyl oxidase                                                     |   |   |   |   | X |   | 1 |
| LRCH1   | 13 | leucine rich repeats and calponin<br>homology domain containing 1 |   |   |   |   | X |   | 1 |
| LRG1    | 19 | leucine rich alpha-2-glycoprotein 1                               |   | X | X |   |   |   | 2 |
| LRRC32  | 11 | leucine rich repeat containing 32                                 | X |   |   |   |   |   | 1 |
| LTBP1   | 2  | latent transforming growth factor<br>beta binding protein 1       | X |   |   |   |   |   | 1 |
| LTBP4   | 19 | latent transforming growth factor<br>beta binding protein 4       | X |   |   |   |   |   | 1 |
| LTC4S   | 5  | leukotriene C4 synthase                                           | X |   |   |   |   |   | 1 |
| LUM     | 12 | lumican                                                           |   | X |   |   |   |   | 1 |
| MAD1L1  | 7  | mitotic arrest deficient 1 like 1                                 |   |   |   | X |   |   | 1 |
| MAD2L2  | 1  | mitotic arrest deficient 2 like 2                                 |   |   |   | X |   |   | 1 |
| MAFK    | 7  | MAF bZIP transcription factor K                                   |   |   |   |   | X |   | 1 |
| MAML1   | 5  | mastermind like transcriptional<br>coactivator 1                  |   |   |   |   | X |   | 1 |
| MAP2K1  | 15 | mitogen-activated protein kinase<br>kinase 1                      |   |   |   |   | X |   | 1 |
| MAP2K3  | 17 | mitogen-activated protein kinase<br>kinase 3                      |   |   |   |   |   | X | 1 |
| MAP2K6  | 17 | mitogen-activated protein kinase<br>kinase 6                      |   |   |   |   |   | X | 1 |
| MAP3K1  | 5  | mitogen-activated protein kinase<br>kinase kinase 1               |   |   |   | X |   |   | 1 |
| MAP3K10 | 19 | mitogen-activated protein kinase<br>kinase kinase 10              |   |   |   |   |   | X | 1 |
| MAP3K7  | 6  | mitogen-activated protein kinase<br>kinase kinase 7               | X | X | X |   |   | X | 4 |
| MAPK1   | 22 | mitogen-activated protein kinase 1                                | X |   |   | X |   | X | 3 |

|        |    |                                                         |   |   |   |   |   |   |   |  |   |
|--------|----|---------------------------------------------------------|---|---|---|---|---|---|---|--|---|
| MAPK14 | 6  | mitogen-activated protein kinase 14                     |   | X |   |   | X |   | X |  | 3 |
| MAPK3  | 16 | mitogen-activated protein kinase 3                      | X |   |   | X | X | X |   |  | 4 |
| MAPK8  | 10 | mitogen-activated protein kinase 8                      |   |   |   |   | X | X |   |  | 2 |
| MAX    | 14 | MYC associated factor X                                 |   |   |   | X | X | X |   |  | 3 |
| MCAM   | 11 | melanoma cell adhesion molecule                         | X |   |   |   |   |   |   |  | 1 |
| MDM4   | 1  | MDM4, p53 regulator                                     |   |   |   |   | X | X |   |  | 2 |
| MECOM  | 3  | MDS1 and EVI1 complex locus                             |   |   |   | X | X | X |   |  | 3 |
| MED15  | 22 | mediator complex subunit 15                             |   |   |   | X | X | X |   |  | 3 |
| MED24  | 17 | mediator complex subunit 24                             |   |   |   | X | X |   |   |  | 2 |
| MED6   | 14 | mediator complex subunit 6                              |   |   |   | X | X |   |   |  | 2 |
| MEF2A  | 15 | myocyte enhancer factor 2A                              |   |   |   | X | X |   |   |  | 2 |
| MEF2C  | 5  | myocyte enhancer factor 2C                              |   |   |   | X | X | X |   |  | 3 |
| MEN1   | 11 | menin 1                                                 |   |   |   | X | X | X |   |  | 3 |
| MIA    | 19 | melanoma inhibitory activity                            | X |   |   |   |   |   |   |  | 1 |
| MITF   | 3  | melanogenesis associated transcription factor           |   |   |   |   | X |   |   |  | 1 |
| MKL1   | 22 | megakaryoblastic leukemia (translocation) 1             |   |   |   |   | X |   |   |  | 1 |
| MLTK   | 2  | mitogen-activated protein kinase kinase kinase 20       |   | X |   |   |   |   |   |  | 1 |
| MME    | 3  | membrane metalloendopeptidase                           | X |   |   |   |   |   |   |  | 1 |
| MMP1   | 11 | matrix metalloproteinase 1                              |   |   |   |   | X |   |   |  | 1 |
| MMP2   | 16 | matrix metalloproteinase 2                              | X |   |   |   |   |   |   |  | 1 |
| MMP20  | 11 | matrix metalloproteinase 20                             |   | X |   |   |   |   |   |  | 1 |
| MMP25  | 16 | matrix metalloproteinase 25                             |   | X |   |   |   |   |   |  | 1 |
| MMP9   | 20 | matrix metalloproteinase 9                              | X |   |   |   | X | X |   |  | 3 |
| MMRN1  | 4  | multimerin 1                                            | X |   |   |   |   |   |   |  | 1 |
| MMS19  | 10 | MMS19 homolog, cytosolic iron-sulfur assembly component |   | X | X |   |   |   |   |  | 2 |
| MNAT1  | 14 | MNAT1, CDK activating kinase assembly factor            |   | X | X |   |   |   |   |  | 2 |
| MOXD1  | 6  | monooxygenase DBH like 1                                |   |   |   |   |   |   | X |  | 1 |



|        |    |                                                                   |   |   |   |   |   |   |   |   |   |
|--------|----|-------------------------------------------------------------------|---|---|---|---|---|---|---|---|---|
| NEDD9  | 6  | neural precursor cell expressed, developmentally down-regulated 9 |   |   |   | X | X |   |   | 2 |   |
| NF1    | 17 | neurofibromin 1                                                   |   |   |   | X | X | X |   | 3 |   |
| NFE2L2 | 2  | nuclear factor, erythroid 2 like 2                                |   |   |   |   | X |   |   | 1 |   |
| NFIC   | 19 | nuclear factor I C                                                |   |   |   |   | X |   |   | 1 |   |
| NFKB1  | 4  | nuclear factor kappa B subunit 1                                  | X |   |   |   |   |   |   | 1 |   |
| NFYC   | 1  | nuclear transcription factor Y subunit gamma                      |   |   |   | X | X |   |   | 2 |   |
| NGFR   | 17 | nerve growth factor receptor                                      |   |   |   |   |   |   | X | 1 |   |
| NKX2-1 | 14 | NK2 homeobox 1                                                    |   |   |   |   | X |   |   | 1 |   |
| NKX2-5 | 5  | NK2 homeobox 5                                                    |   |   |   | X | X | X |   | 3 |   |
| NKX3-2 | 4  | NK3 homeobox 2                                                    |   |   |   |   |   |   | X | 1 |   |
| NLK    | 17 | nemo like kinase                                                  |   |   |   |   |   |   | X | 1 |   |
| NODAL  | 10 | nodal growth differentiation factor                               |   |   |   | X | X |   |   | 2 |   |
| NOS3   | 7  | nitric oxide synthase 3                                           | X |   |   | X |   |   |   | 2 |   |
| NOTCH1 | 9  | notch 1                                                           |   | X |   |   |   | X |   | 2 |   |
| NOTCH3 | 19 | notch 3                                                           |   |   |   | X | X | X |   | 3 |   |
| NOX4   | 11 | NADPH oxidase 4                                                   | X |   |   |   |   |   |   | 1 |   |
| NR2C2  | 3  | nuclear receptor subfamily 2 group C member 2                     | X | X | X |   |   |   |   | 3 |   |
| NR2F2  | 15 | nuclear receptor subfamily 2 group F member 2                     |   |   |   |   |   |   | X | 1 |   |
| NR3C1  | 5  | nuclear receptor subfamily 3 group C member 1                     |   |   |   |   | X | X |   | 2 |   |
| NR4A1  | 12 | nuclear receptor subfamily 4 group A member 1                     |   |   |   |   |   |   |   | X | 1 |
| NR5A1  | 9  | nuclear receptor subfamily 5 group A member 1                     |   |   |   |   |   |   | X | 1 |   |
| NRP1   | 10 | neuropilin 1                                                      |   | X | X |   |   |   |   | 2 |   |
| NRP2   | 2  | neuropilin 2                                                      |   |   | X |   |   |   |   | 1 |   |
| NUP153 | 6  | nucleoporin 153                                                   |   |   |   | X | X | X |   | 3 |   |
| NUP214 | 9  | nucleoporin 214                                                   |   |   |   | X | X | X |   | 3 |   |

|        |    |                                                  |   |   |   |   |   |   |   |   |
|--------|----|--------------------------------------------------|---|---|---|---|---|---|---|---|
| OCLN   | 5  | occludin                                         |   | X | X |   |   |   |   | 2 |
| ODC1   | 2  | ornithine decarboxylase 1                        |   |   |   |   |   | X |   | 1 |
| OLIG1  | 21 | oligodendrocyte transcription factor 1           |   |   |   | X |   | X |   | 2 |
| OMD    | 9  | osteomodulin                                     | X |   |   |   |   |   |   | 1 |
| OPA1   | 3  | OPA1, mitochondrial dynamin like GTPase          |   |   |   | X |   | X |   | 2 |
| OTUB1  | 11 | OTU deubiquitinase, ubiquitin aldehyde binding 1 |   |   |   | X |   | X | X | 3 |
| PAEP   | 9  | progesterone associated endometrial protein      |   |   |   |   |   | X |   | 1 |
| PAK1   | 11 | p21 (RAC1) activated kinase 1                    |   |   |   | X |   |   |   | 1 |
| PAK2   | 3  | p21 (RAC1) activated kinase 2                    |   |   |   | X |   |   |   | 1 |
| PAK4   | 19 | p21 (RAC1) activated kinase 4                    |   |   |   | X |   |   |   | 1 |
| PARD3  | 10 | par-3 family cell polarity regulator             | X | X | X | X | X | X | X | 7 |
| PARD3B | 2  | par-3 family cell polarity regulator beta        |   |   |   | X | X | X | X | 4 |
| PARD6A | 16 | par-6 family cell polarity regulator alpha       | X | X | X |   |   |   |   | 3 |
| PARP1  | 1  | poly(ADP-ribose) polymerase 1                    |   |   |   | X | X | X |   | 3 |
| PAX6   | 11 | paired box 6                                     | X |   |   |   | X | X |   | 3 |
| PBX1   | 1  | PBX homeobox 1                                   |   |   |   |   |   | X |   | 1 |
| PCNA   | 20 | proliferating cell nuclear antigen               |   |   |   | X |   |   |   | 1 |
| PDGFB  | 22 | platelet derived growth factor subunit B         | X |   |   |   |   |   |   | 1 |
| PDGFRA | 4  | platelet derived growth factor receptor alpha    | X |   |   |   |   |   |   | 1 |
| PDPK1  | 16 | 3-phosphoinositide dependent protein kinase 1    |   | X | X |   |   |   | X | 3 |
| PEG10  | 7  | paternally expressed 10                          |   | X | X |   |   |   |   | 2 |
| PEX6   | 6  | peroxisomal biogenesis factor 6                  |   |   |   |   | X |   |   | 1 |
| PF4    | 4  | platelet factor 4                                | X |   |   |   |   |   |   | 1 |

|        |    |                                                                        |   |   |   |   |   |   |   |   |
|--------|----|------------------------------------------------------------------------|---|---|---|---|---|---|---|---|
| PGR    | 11 | progesterone receptor                                                  | X |   |   |   |   |   |   | 1 |
| PHKG2  | 16 | phosphorylase catalytic subunit gamma 2                                |   | X | X |   |   |   |   | 2 |
| PIAS1  | 15 | protein inhibitor of activated STAT 1                                  |   |   |   |   |   | X |   | 1 |
| PIAS2  | 18 | protein inhibitor of activated STAT 2                                  |   |   |   |   | X | X |   | 2 |
| PIAS4  | 19 | protein inhibitor of activated STAT 4                                  |   |   |   | X | X | X | X | 4 |
| PIK3CA | 3  | phosphatidylinositol-4,5-bisphosphate 3-kinase catalytic subunit alpha |   |   |   | X | X |   |   | 2 |
| PIK3R1 | 5  | phosphoinositide-3-kinase regulatory subunit 1                         |   | X | X |   |   |   |   | 2 |
| PIK3R2 | 19 | phosphoinositide-3-kinase regulatory subunit 2                         |   | X | X |   |   |   |   | 2 |
| PIN1   | 19 | peptidylprolyl cis/trans isomerase, NIMA-interacting 1                 |   |   |   | X | X |   |   | 2 |
| PITX1  | 5  | paired like homeodomain 1                                              |   |   |   |   | X |   |   | 1 |
| PITX2  | 4  | paired like homeodomain 2                                              |   |   |   |   | X |   |   | 1 |
| PKNOX1 | 21 | PBX/knotted 1 homeobox 1                                               |   |   |   | X |   |   |   | 1 |
| PLG    | 6  | plasminogen                                                            | X |   |   |   |   |   |   | 1 |
| PLOD1  | 1  | procollagen-lysine,2-oxoglutarate 5-dioxygenase 1                      | X |   |   |   |   |   |   | 1 |
| PMEPA1 | 20 | prostate transmembrane protein, androgen induced 1                     |   |   |   | X | X |   |   | 2 |
| PML    | 15 | promyelocytic leukemia                                                 |   | X | X | X | X |   | X | 5 |
| POSTN  | 13 | periostin                                                              | X |   |   |   |   |   |   | 1 |
| POU5F1 | 6  | POU class 5 homeobox 1                                                 |   |   |   |   |   | X |   | 1 |
| PPARA  | 22 | peroxisome proliferator activated receptor alpha                       |   |   |   |   |   | X |   | 1 |
| PPARD  | 6  | peroxisome proliferator activated receptor delta                       |   |   |   |   |   | X |   | 1 |

|          |    |                                                                      |   |   |   |   |   |   |   |   |
|----------|----|----------------------------------------------------------------------|---|---|---|---|---|---|---|---|
| PPARG    | 3  | peroxisome proliferator activated receptor gamma                     | X |   |   | X |   |   |   | 2 |
| PPBP     | 4  | pro-platelet basic protein                                           | X |   |   |   |   |   |   | 1 |
| PPM1A    | 14 | protein phosphatase, Mg <sup>2+</sup> /Mn <sup>2+</sup> dependent 1A |   |   |   | X | X | X |   | 3 |
| PPP1CA   | 11 | protein phosphatase 1 catalytic subunit alpha                        | X | X | X |   |   |   | X | 4 |
| PPP1CB   | 2  | protein phosphatase 1 catalytic subunit beta                         | X | X | X |   |   |   | X | 4 |
| PPP1CC   | 12 | protein phosphatase 1 catalytic subunit gamma                        | X | X | X |   |   |   | X | 4 |
| PPP1R15A | 19 | protein phosphatase 1 regulatory subunit 15A                         | X | X | X |   |   |   | X | 4 |
| PPP2CA   | 5  | protein phosphatase 2 catalytic subunit alpha                        |   |   |   | X |   |   |   | 1 |
| PPP2CB   | 8  | protein phosphatase 2 catalytic subunit beta                         |   |   |   | X |   |   |   | 1 |
| PPP2R1A  | 19 | protein phosphatase 2 scaffold subunit Aalpha                        |   |   |   | X |   |   |   | 1 |
| PPP2R1B  | 11 | protein phosphatase 2 scaffold subunit Abeta                         |   |   |   | X |   |   |   | 1 |
| PPP2R2A  | 8  | protein phosphatase 2 regulatory subunit Balpha                      |   |   | X | X |   |   |   | 2 |
| PPP2R5D  | 6  | protein phosphatase 2 regulatory subunit B'delta                     | X | X | X |   |   |   |   | 3 |
| PRDM14   | 8  | PR/SET domain 14                                                     |   |   |   |   |   |   | X | 1 |
| PRDM16   | 1  | PR/SET domain 16                                                     |   |   |   | X | X |   |   | 2 |
| PRG4     | 1  | proteoglycan 4                                                       | X |   |   |   |   |   |   | 1 |
| PRKAA1   | 5  | protein kinase AMP-activated catalytic subunit alpha 1               |   | X | X |   |   |   |   | 2 |
| PRKAB1   | 12 | protein kinase AMP-activated non-catalytic subunit beta 1            |   |   |   | X |   |   |   | 1 |

|         |    |                                                                |   |   |   |   |   |   |
|---------|----|----------------------------------------------------------------|---|---|---|---|---|---|
| PRKACA  | 19 | protein kinase cAMP-activated catalytic subunit alpha          |   | X | X |   |   | 2 |
| PRKACB  | 1  | protein kinase cAMP-activated catalytic subunit beta           |   | X | X |   |   | 2 |
| PRKAG1  | 12 | protein kinase AMP-activated non-catalytic subunit gamma 1     |   | X | X |   |   | 2 |
| PRKAG2  | 7  | protein kinase AMP-activated non-catalytic subunit gamma 2     |   | X | X |   |   | 2 |
| PRKAG3  | 2  | protein kinase AMP-activated non-catalytic subunit gamma 3     |   | X | X |   |   | 2 |
| PRKAR1A | 17 | protein kinase cAMP-dependent type I regulatory subunit alpha  |   | X | X |   |   | 2 |
| PRKAR1B | 7  | protein kinase cAMP-dependent type I regulatory subunit beta   |   | X | X |   |   | 2 |
| PRKAR2A | 3  | protein kinase cAMP-dependent type II regulatory subunit alpha |   | X | X |   |   | 2 |
| PRKCZ   | 1  | protein kinase C zeta                                          | X | X | X |   |   | 3 |
| PRKG1   | 10 | protein kinase, cGMP-dependent, type I                         |   |   |   |   | X | 1 |
| PRL     | 6  | prolactin                                                      | X |   |   |   |   | 1 |
| PROC    | 2  | protein C, inactivator of coagulation factors Va and VIIIa     |   |   |   | X | X | 2 |
| PROM1   | 4  | prominin 1                                                     | X |   |   |   |   | 1 |
| PROS1   | 3  | protein S                                                      | X |   |   |   |   | 1 |
| PRTN3   | 19 | proteinase 3                                                   |   |   |   | X |   | 1 |
| PSEN1   | 14 | presenilin 1                                                   |   | X |   |   |   | 1 |
| PSPC1   | 13 | paraspeckle component 1                                        |   |   |   | X |   | 1 |
| PTEN    | 10 | phosphatase and tensin homolog                                 | X |   |   | X | X | 3 |
| PTGS2   | 1  | prostaglandin-endoperoxide synthase 2                          | X |   |   |   |   | 1 |
| PTH     | 11 | parathyroid hormone                                            |   |   |   | X |   | 1 |
| PTH LH  | 12 | parathyroid hormone like hormone                               | X |   |   |   |   | 1 |
| PTK2    | 8  | protein tyrosine kinase 2                                      | X |   |   |   |   | 1 |





|          |    |                                              |   |   |   |   |   |   |   |   |
|----------|----|----------------------------------------------|---|---|---|---|---|---|---|---|
| RNF111   | 15 | ring finger protein 111                      |   |   |   | X | X |   | X | 3 |
| RNF165   | 18 | ring finger protein 165                      |   |   |   |   |   |   | X | 1 |
| RORC     | 1  | RAR related orphan receptor C                | X |   |   |   |   |   |   | 1 |
| RPS27A   | 2  | ribosomal protein S27a                       | X | X | X | X | X | X | X | 7 |
| RPS6KB1  | 17 | ribosomal protein S6 kinase B1               | X | X | X |   |   |   |   | 3 |
| RSPH3    | 6  | radial spoke head 3 homolog                  |   |   |   |   | X |   |   | 1 |
| RUNX1    | 21 | runt related transcription factor 1          |   |   |   | X | X | X |   | 3 |
| RUNX2    | 6  | runt related transcription factor 2          |   |   |   | X | X | X |   | 3 |
| RUNX3    | 1  | runt related transcription factor 3          |   |   |   | X | X | X |   | 3 |
| S100A4   | 1  | S100 calcium binding protein A4              |   |   |   | X | X |   |   | 2 |
| SALL4    | 20 | spalt like transcription factor 4            |   |   |   |   |   | X |   | 1 |
| SAP18    | 13 | Sin3A associated protein 18                  |   |   |   | X | X | X |   | 3 |
| SAP30    | 4  | Sin3A associated protein 30                  |   |   |   | X | X | X |   | 3 |
| SAR1A    | 10 | secretion associated Ras related GTPase 1A   | X | X | X | X |   |   | X | 5 |
| SDC1     | 2  | syndecan 1                                   | X |   |   |   |   |   |   | 1 |
| SDC2     | 8  | syndecan 2                                   | X |   |   |   |   |   |   | 1 |
| SERPINA1 | 14 | serpin family A member 1                     | X |   |   |   |   |   |   | 1 |
| SERPINE1 | 7  | serpin family E member 1                     | X | X |   | X | X | X | X | 6 |
| SERPINF2 | 17 | serpin family F member 2                     | X |   |   |   |   |   |   | 1 |
| SERPING1 | 11 | serpin family G member 1                     | X |   |   |   |   |   |   | 1 |
| SETDB1   | 1  | SET domain bifurcated 1                      |   |   |   |   | X |   |   | 1 |
| SF3A1    | 22 | splicing factor 3a subunit 1                 |   |   |   |   | X |   |   | 1 |
| SF3B2    | 11 | splicing factor 3b subunit 2                 |   |   |   |   | X |   |   | 1 |
| SFTPB    | 2  | surfactant protein B                         |   |   |   |   | X |   |   | 1 |
| SH2D2A   | 1  | SH2 domain containing 2A                     |   |   |   | X | X |   |   | 2 |
| SHC1     | 1  | SHC adaptor protein 1                        |   | X | X |   |   |   |   | 2 |
| SIK3     | 11 | SIK family kinase 3                          |   |   |   | X | X |   |   | 2 |
| SIN3A    | 15 | SIN3 transcription regulator family member A |   |   |   | X | X | X |   | 3 |







|           |    |                                                               |   |   |   |   |   |   |   |   |   |
|-----------|----|---------------------------------------------------------------|---|---|---|---|---|---|---|---|---|
| TCF7L2    | 10 | transcription factor 7 like 2                                 |   |   |   |   |   |   | X |   | 1 |
| TCTEX1D4  | 1  | Tctex1 domain containing 4                                    |   |   | X |   |   |   |   |   | 1 |
| TDGF1     | 3  | teratocarcinoma-derived growth factor 1                       |   |   |   |   |   |   |   | X | 1 |
| TERT      | 5  | telomerase reverse transcriptase                              |   |   | X |   | X |   |   |   | 2 |
| TFDP1     | 13 | transcription factor Dp-1                                     |   |   |   | X | X | X |   |   | 3 |
| TFDP2     | 3  | transcription factor Dp-2                                     |   |   |   | X | X | X |   |   | 3 |
| TFEB      | 6  | transcription factor EB                                       |   |   |   |   |   |   |   | X | 1 |
| TGFB1     | 19 | transforming growth factor beta 1                             |   | X | X | X | X | X | X | X | 7 |
| TGFB1I1   | 16 | transforming growth factor beta 1 induced transcript 1        |   |   |   |   | X | X | X |   | 3 |
| TGFB2     | 1  | transforming growth factor beta 2                             | X | X | X | X | X | X |   |   | 6 |
| TGFB3     | 14 | transforming growth factor beta 3                             | X | X | X | X | X | X |   |   | 6 |
| TGFBR1    | 9  | transforming growth factor beta receptor 1                    | X |   | X | X | X |   |   | X | 6 |
| TGFBR2    | 3  | transforming growth factor beta receptor 2                    | X | X |   | X | X | X | X |   | 7 |
| TGFBR3    | 1  | transforming growth factor beta receptor 3                    | X | X | X |   |   |   |   |   | 3 |
| TGFBRAP1  | 2  | transforming growth factor beta receptor associated protein 1 | X | X | X | X |   |   | X |   | 5 |
| TGIF1     | 18 | TGFB induced factor homeobox 1                                |   |   |   | X | X | X |   |   | 3 |
| TGIF2     | 20 | TGFB induced factor homeobox 2                                |   |   |   | X | X | X |   |   | 3 |
| THBS1     | 15 | thrombospondin 1                                              | X |   |   |   |   | X |   |   | 2 |
| THOC5     | 22 | THO complex 5                                                 |   |   |   |   |   | X |   |   | 1 |
| TIMP3     | 22 | TIMP metalloproteinase inhibitor 3                            | X |   |   |   |   |   |   |   | 1 |
| TJP1      | 15 | tight junction protein 1                                      | X |   |   |   |   |   |   |   | 1 |
| TLE1      | 9  | transducin like enhancer of split 1                           |   |   |   |   |   | X |   |   | 1 |
| TLX2      | 2  | T cell leukemia homeobox 2                                    |   |   |   |   |   | X |   |   | 1 |
| TNFRSF11B | 8  | TNF receptor superfamily member 11b                           | X |   |   |   |   |   |   |   | 1 |
| TNFSF13B  | 13 | TNF superfamily member 13b                                    |   |   |   |   |   | X |   |   | 1 |

|         |    |                                                           |   |   |   |   |   |   |   |   |
|---------|----|-----------------------------------------------------------|---|---|---|---|---|---|---|---|
| TNK1    | 17 | tyrosine kinase non receptor 1                            |   |   |   |   |   | X |   | 1 |
| TOB1    | 17 | transducer of ERBB2, 1                                    |   |   |   |   | X | X |   | 2 |
| TOLLIP  | 11 | toll interacting protein                                  |   | X |   |   |   |   | X | 2 |
| TP53    | 17 | tumor protein p53                                         | X |   |   | X | X | X | X | 5 |
| TP63    | 3  | tumor protein p63                                         |   |   |   |   | X |   |   | 1 |
| TPM1    | 15 | tropomyosin 1                                             |   | X |   |   |   |   |   | 1 |
| TPM3    | 1  | tropomyosin 3                                             |   |   |   |   | X |   |   | 1 |
| TRAF4   | 17 | TNF receptor associated factor 4                          |   | X | X |   |   |   |   | 2 |
| TRAF6   | 11 | TNF receptor associated factor 6                          |   | X | X |   |   |   |   | 2 |
| TRAP1   | 16 | TNF receptor associated protein 1                         |   | X |   |   |   |   |   | 1 |
| TRIB3   | 20 | tribbles pseudokinase 3                                   |   |   |   |   | X |   |   | 1 |
| TRIM33  | 1  | tripartite motif containing 33                            |   |   |   | X | X | X |   | 3 |
| TRIM62  | 1  | tripartite motif containing 62                            |   |   |   |   | X |   |   | 1 |
| TSC2    | 16 | TSC complex subunit 2                                     |   |   |   | X | X |   |   | 2 |
| TSC22D1 | 13 | TSC22 domain family member 1                              |   | X | X |   |   |   | X | 3 |
| TTK     | 6  | TTK protein kinase                                        |   |   |   | X |   |   |   | 1 |
| TWIST1  | 7  | twist family bHLH transcription factor 1                  |   |   |   |   |   | X |   | 1 |
| TXN     | 9  | thioredoxin                                               |   |   |   |   |   |   | X | 1 |
| U2AF2   | 19 | U2 small nuclear RNA auxiliary factor 2                   |   |   |   | X |   |   |   | 1 |
| UBA52   | 19 | ubiquitin A-52 residue ribosomal protein fusion product 1 | X | X | X | X | X | X | X | 7 |
| UBB     | 17 | ubiquitin B                                               | X | X | X | X | X | X | X | 7 |
| UBC     | 12 | ubiquitin C                                               | X | X | X | X | X | X | X | 7 |
| UBE2D1  | 10 | ubiquitin conjugating enzyme E2 D1                        |   |   |   | X | X | X |   | 3 |
| UBE2M   | 19 | ubiquitin conjugating enzyme E2 M                         |   |   | X |   |   |   |   | 1 |
| UBE2O   | 17 | ubiquitin conjugating enzyme E2 O                         |   |   |   |   |   |   | X | 1 |
| UCHL5   | 1  | ubiquitin C-terminal hydrolase L5                         | X | X | X | X | X |   | X | 6 |
| UCN     | 2  | urocortin                                                 | X |   |   |   |   |   |   | 1 |

|       |    |                                                    |   |   |   |   |   |   |   |   |
|-------|----|----------------------------------------------------|---|---|---|---|---|---|---|---|
| UCP2  | 11 | uncoupling protein 2                               |   |   |   |   |   | X |   | 1 |
| USP15 | 12 | ubiquitin specific peptidase 15                    | X | X | X | X | X | X | X | 7 |
| USP4  | 3  | ubiquitin specific peptidase 4                     |   | X |   |   |   |   |   | 1 |
| VASN  | 16 | vasorin                                            | X |   |   |   |   |   |   | 1 |
| VDR   | 12 | vitamin D receptor                                 | X |   |   |   | X | X |   | 3 |
| VEGFA | 6  | vascular endothelial growth factor A               | X |   |   |   |   | X |   | 2 |
| VEGFB | 11 | vascular endothelial growth factor B               | X |   |   |   |   |   |   | 1 |
| VEGFC | 4  | vascular endothelial growth factor C               | X |   |   |   |   |   |   | 1 |
| VIM   | 10 | vimentin                                           | X |   |   |   | X |   |   | 2 |
| VWF   | 12 | von Willebrand factor                              | X |   |   |   |   |   |   | 1 |
| WISP2 | 20 | WNT1 inducible signaling pathway protein 2         | X |   |   |   |   |   |   | 1 |
| WNK1  | 12 | WNK lysine deficient protein kinase 1              |   |   |   | X |   |   |   | 1 |
| WNK4  | 17 | WNK lysine deficient protein kinase 4              |   |   |   | X |   |   |   | 1 |
| WNT1  | 12 | Wnt family member 1                                |   |   |   |   |   | X |   | 1 |
| WT1   | 11 | Wilms tumor 1                                      | X |   |   |   |   |   |   | 1 |
| WWOX  | 16 | WW domain containing oxidoreductase                |   |   |   |   | X | X |   | 2 |
| WWP1  | 8  | WW domain containing E3 ubiquitin protein ligase 1 |   | X | X | X | X | X | X | 6 |
| WWP2  | 16 | WW domain containing E3 ubiquitin protein ligase 2 |   |   |   | X |   |   | X | 2 |
| WWTR1 | 3  | WW domain containing transcription regulator 1     |   |   |   | X | X | X | X | 4 |
| XPO1  | 2  | exportin 1                                         |   |   |   |   |   | X | X | 2 |
| XPO4  | 13 | exportin 4                                         |   |   |   |   | X |   |   | 1 |
| YAP1  | 11 | Yes associated protein 1                           |   | X | X |   |   | X | X | 4 |



|                                        |    |                                                                                |     |     |     |     |     |     |     |   |   |
|----------------------------------------|----|--------------------------------------------------------------------------------|-----|-----|-----|-----|-----|-----|-----|---|---|
| YBX1                                   | 1  | Y-box binding protein 1                                                        | X   |     |     |     | X   |     | X   |   | 3 |
| YTHDF2                                 | 1  | YTH N6-methyladenosine RNA binding protein 2                                   |     |     |     |     | X   |     |     |   | 1 |
| YWHAE                                  | 17 | tyrosine 3-monooxygenase/tryptophan 5-monooxygenase activation protein epsilon | X   |     |     |     |     |     |     |   | 1 |
| YY1                                    | 14 | YY1 transcription factor                                                       | X   |     |     | X   | X   | X   | X   | X | 5 |
| ZBTB17                                 | 1  | zinc finger and BTB domain containing 17                                       |     |     |     | X   | X   | X   |     |   | 3 |
| ZBTB3                                  | 11 | zinc finger and BTB domain containing 3                                        |     |     |     |     | X   |     |     |   | 1 |
| ZDHHC4                                 | 7  | zinc finger DHHC-type containing 4                                             |     |     |     |     | X   |     |     |   | 1 |
| ZEB1                                   | 10 | zinc finger E-box binding homeobox 1                                           |     |     |     | X   | X   | X   | X   |   | 4 |
| ZEB2                                   | 2  | zinc finger E-box binding homeobox 2                                           |     |     |     | X   | X   |     |     |   | 2 |
| ZFYVE16                                | 5  | zinc finger FYVE-type containing 16                                            |     | X   | X   | X   |     |     | X   |   | 4 |
| ZFYVE9                                 | 1  | zinc finger FYVE-type containing 9                                             |     | X   | X   | X   | X   |     |     | X | 5 |
| ZMIZ1                                  | 10 | zinc finger MIZ-type containing 1                                              |     |     |     |     | X   | X   |     |   | 2 |
| ZMYM2                                  | 13 | zinc finger MYM-type containing 2                                              |     |     |     |     | X   |     |     |   | 1 |
| ZNF423                                 | 16 | zinc finger protein 423                                                        |     |     |     |     |     |     | X   |   | 1 |
| ZNF521                                 | 18 | zinc finger protein 521                                                        |     |     |     |     |     |     | X   |   | 1 |
| ZNF8                                   | 19 | zinc finger protein 8                                                          |     |     |     | X   | X   | X   |     |   | 3 |
| ZSCAN10                                | 16 | zinc finger and SCAN domain containing 10                                      |     |     |     |     |     |     | X   |   | 1 |
| Total of targeted genes per core genes |    |                                                                                | 223 | 132 | 122 | 221 | 305 | 229 | 123 |   |   |

- (<sup>a</sup>) We used The Human Gene Connectome to search for targeted genes connected to each of the 7 main core genes at a degree of connectivity of 1. We selected only autosomal genes. We ended up with a total of 707 genes connected to the TGFB pathway.
- (<sup>b</sup>) Number of main core genes connected to the target gene.

**Supplementary table 2. Results of the rare variant association study between liver fibrosis and 116 autosomal genes with more than 5 carriers of candidate coding variants (CCVs).**

| Gene name      | Total number of CCVs | Number of carriers           |                          | Total (N=88) | P-value(£)   |
|----------------|----------------------|------------------------------|--------------------------|--------------|--------------|
|                |                      | Severe liver fibrosis (N=48) | No liver fibrosis (N=40) |              |              |
| <i>ENG</i>     | 3                    | 7                            | 0                        | 7            | 0.0003767402 |
| <i>TCF7L1</i>  | 3                    | 10                           | 1                        | 11           | 0.004880177  |
| <i>ICAM1</i>   | 3                    | 2                            | 8                        | 10           | 0.01665771   |
| <i>AGL</i>     | 5                    | 8                            | 1                        | 9            | 0.0190327    |
| <i>TGFB1</i>   | 1                    | 2                            | 8                        | 10           | 0.02157767   |
| <i>ATM</i>     | 9                    | 4                            | 10                       | 14           | 0.03145805   |
| <i>CYP19A1</i> | 3                    | 7                            | 1                        | 8            | 0.03300056   |
| <i>KDM6B</i>   | 8                    | 10                           | 17                       | 27           | 0.03541138   |
| <i>PRG4</i>    | 5                    | 3                            | 8                        | 11           | 0.05336971   |
| <i>TOLLIP</i>  | 2                    | 8                            | 2                        | 10           | 0.05526237   |
| <i>TJPI</i>    | 2                    | 6                            | 1                        | 7            | 0.06071706   |
| <i>EPS15</i>   | 4                    | 3                            | 7                        | 10           | 0.1253163    |
| <i>OPA1</i>    | 9                    | 11                           | 4                        | 15           | 0.1446664    |
| <i>FOXMI</i>   | 3                    | 5                            | 1                        | 6            | 0.1457352    |
| <i>ACTN1</i>   | 3                    | 2                            | 5                        | 7            | 0.1503467    |
| <i>NCAM1</i>   | 6                    | 20                           | 11                       | 31           | 0.1515251    |
| <i>PPP1CA</i>  | 1                    | 6                            | 2                        | 8            | 0.1600318    |
| <i>NCBP1</i>   | 3                    | 6                            | 2                        | 8            | 0.1683185    |
| <i>MUC2</i>    | 13                   | 15                           | 8                        | 23           | 0.1789459    |
| <i>RUNX2</i>   | 4                    | 11                           | 15                       | 26           | 0.1810995    |
| <i>BMPR2</i>   | 2                    | 6                            | 2                        | 8            | 0.1868056    |
| <i>NRP2</i>    | 4                    | 4                            | 7                        | 11           | 0.1971068    |
| <i>GLI3</i>    | 11                   | 8                            | 11                       | 19           | 0.20023      |
| <i>MYOCD</i>   | 4                    | 6                            | 2                        | 8            | 0.2021462    |
| <i>NOTCH3</i>  | 12                   | 11                           | 5                        | 16           | 0.2196094    |
| <i>EPB41L5</i> | 3                    | 5                            | 2                        | 7            | 0.2342188    |
| <i>LAMC1</i>   | 10                   | 9                            | 4                        | 13           | 0.2475057    |
| <i>KRT10</i>   | 1                    | 20                           | 22                       | 42           | 0.2533108    |
| <i>BRCA2</i>   | 12                   | 7                            | 9                        | 16           | 0.2638085    |
| <i>ANK1</i>    | 9                    | 7                            | 10                       | 17           | 0.2642263    |
| <i>ARID1B</i>  | 7                    | 16                           | 9                        | 25           | 0.2651101    |
| <i>NOTCH1</i>  | 14                   | 8                            | 11                       | 19           | 0.265763     |
| <i>PTK2</i>    | 4                    | 3                            | 5                        | 8            | 0.2812634    |
| <i>CCL17</i>   | 1                    | 5                            | 2                        | 7            | 0.2824949    |
| <i>HNF1A</i>   | 3                    | 3                            | 5                        | 8            | 0.2932677    |
| <i>CD44</i>    | 2                    | 2                            | 4                        | 6            | 0.2994858    |

|                 |    |    |    |    |           |
|-----------------|----|----|----|----|-----------|
| <i>TLE1</i>     | 2  | 5  | 2  | 7  | 0.3101249 |
| <i>CDC25A</i>   | 2  | 2  | 4  | 6  | 0.3382606 |
| <i>SREBF2</i>   | 3  | 5  | 2  | 7  | 0.3448401 |
| <i>SERPING1</i> | 2  | 3  | 5  | 8  | 0.3716798 |
| <i>YY1</i>      | 2  | 6  | 3  | 9  | 0.3911472 |
| <i>SLC25A12</i> | 1  | 6  | 3  | 9  | 0.401652  |
| <i>PPARA</i>    | 1  | 10 | 5  | 15 | 0.402628  |
| <i>CREBBP</i>   | 7  | 7  | 4  | 11 | 0.4030689 |
| <i>CDH2</i>     | 3  | 9  | 5  | 14 | 0.41599   |
| <i>MMRN1</i>    | 7  | 5  | 6  | 11 | 0.421695  |
| <i>MCAM</i>     | 5  | 7  | 4  | 11 | 0.425149  |
| <i>MYC</i>      | 3  | 5  | 2  | 7  | 0.4254118 |
| <i>LTBP1</i>    | 13 | 14 | 9  | 23 | 0.4796528 |
| <i>TSC22D1</i>  | 2  | 4  | 2  | 6  | 0.4844154 |
| <i>MST1R</i>    | 3  | 8  | 4  | 12 | 0.4915808 |
| <i>CDKN2A</i>   | 1  | 4  | 2  | 6  | 0.499084  |
| <i>TERT</i>     | 4  | 6  | 7  | 13 | 0.5004928 |
| <i>PRKAG3</i>   | 3  | 5  | 6  | 11 | 0.5070674 |
| <i>ETV4</i>     | 5  | 3  | 4  | 7  | 0.5458456 |
| <i>PYGL</i>     | 4  | 4  | 5  | 9  | 0.5548177 |
| <i>HMMR</i>     | 4  | 4  | 4  | 8  | 0.5624998 |
| <i>SS18L1</i>   | 4  | 3  | 4  | 7  | 0.5700073 |
| <i>C6orf132</i> | 9  | 17 | 16 | 33 | 0.5725212 |
| <i>HIVEP1</i>   | 8  | 9  | 6  | 15 | 0.5869608 |
| <i>FURIN</i>    | 5  | 3  | 4  | 7  | 0.5873681 |
| <i>RSPH3</i>    | 5  | 6  | 3  | 9  | 0.5920537 |
| <i>TSC2</i>     | 9  | 8  | 5  | 13 | 0.6026516 |
| <i>HSPA4</i>    | 4  | 5  | 5  | 10 | 0.6112336 |
| <i>PLG</i>      | 4  | 5  | 2  | 7  | 0.6262203 |
| <i>MAML1</i>    | 6  | 6  | 4  | 10 | 0.629702  |
| <i>FOS</i>      | 2  | 5  | 5  | 10 | 0.6301627 |
| <i>CGN</i>      | 12 | 11 | 11 | 22 | 0.6306096 |
| <i>ARNT</i>     | 2  | 3  | 3  | 6  | 0.6329987 |
| <i>PTPN14</i>   | 8  | 10 | 7  | 17 | 0.6351806 |
| <i>TRAP1</i>    | 11 | 8  | 8  | 16 | 0.6424565 |
| <i>MYO5B</i>    | 9  | 6  | 6  | 12 | 0.6464961 |
| <i>MMP9</i>     | 4  | 3  | 3  | 6  | 0.6881425 |
| <i>DOCK9</i>    | 4  | 8  | 5  | 13 | 0.7019432 |
| <i>NUP153</i>   | 8  | 6  | 4  | 10 | 0.7048017 |
| <i>COL2A1</i>   | 2  | 7  | 5  | 12 | 0.7115241 |
| <i>LTBP4</i>    | 8  | 8  | 6  | 14 | 0.7225749 |
| <i>ADAMTS3</i>  | 7  | 5  | 3  | 8  | 0.7315069 |
| <i>PARD6A</i>   | 1  | 3  | 3  | 6  | 0.7393433 |

|                 |    |    |    |    |           |
|-----------------|----|----|----|----|-----------|
| <i>PARD3B</i>   | 6  | 5  | 3  | 8  | 0.7411917 |
| <i>PRKG1</i>    | 1  | 7  | 5  | 12 | 0.7475818 |
| <i>SLC26A3</i>  | 4  | 3  | 3  | 6  | 0.750003  |
| <i>BTRC</i>     | 1  | 3  | 3  | 6  | 0.7604756 |
| <i>F13A1</i>    | 1  | 4  | 3  | 7  | 0.7678977 |
| <i>POSTN</i>    | 7  | 5  | 5  | 10 | 0.7832856 |
| <i>BMP6</i>     | 5  | 3  | 3  | 6  | 0.7906692 |
| <i>ITGB5</i>    | 8  | 5  | 5  | 10 | 0.7940216 |
| <i>SERPINA1</i> | 3  | 4  | 3  | 7  | 0.7958404 |
| <i>IRX3</i>     | 5  | 3  | 3  | 6  | 0.8021104 |
| <i>ZFYVE9</i>   | 6  | 4  | 3  | 7  | 0.8038968 |
| <i>MUC4</i>     | 5  | 3  | 3  | 6  | 0.8056764 |
| <i>NCOA3</i>    | 5  | 14 | 13 | 27 | 0.8065463 |
| <i>HSPG2</i>    | 38 | 25 | 21 | 46 | 0.8120555 |
| <i>TGIF1</i>    | 4  | 19 | 14 | 33 | 0.8184385 |
| <i>SLC5A4</i>   | 7  | 3  | 3  | 6  | 0.822418  |
| <i>SMAD3</i>    | 1  | 7  | 6  | 13 | 0.8264372 |
| <i>PPP2R1B</i>  | 5  | 8  | 6  | 14 | 0.8328207 |
| <i>NUP214</i>   | 5  | 3  | 3  | 6  | 0.8363385 |
| <i>WISP2</i>    | 3  | 5  | 4  | 9  | 0.8488772 |
| <i>NEDD4</i>    | 5  | 5  | 5  | 10 | 0.8531652 |
| <i>SMARCA4</i>  | 5  | 3  | 3  | 6  | 0.8570248 |
| <i>NCOA1</i>    | 6  | 5  | 5  | 10 | 0.8615588 |
| <i>ID1</i>      | 3  | 4  | 3  | 7  | 0.8664492 |
| <i>VWF</i>      | 16 | 8  | 6  | 14 | 0.8716261 |
| <i>PPP1R15A</i> | 4  | 4  | 3  | 7  | 0.879495  |
| <i>IRAK3</i>    | 5  | 8  | 6  | 14 | 0.8921585 |
| <i>F5</i>       | 3  | 6  | 5  | 11 | 0.9004119 |
| <i>HNF4A</i>    | 2  | 4  | 3  | 7  | 0.9091592 |
| <i>JPH3</i>     | 6  | 3  | 3  | 6  | 0.9185293 |
| <i>BCL6</i>     | 3  | 5  | 4  | 9  | 0.9199447 |
| <i>BRCA1</i>    | 5  | 12 | 10 | 22 | 0.9545136 |
| <i>DEPTOR</i>   | 3  | 5  | 4  | 9  | 0.9617026 |
| <i>SETDB1</i>   | 3  | 7  | 5  | 12 | 0.9643937 |
| <i>MMS19</i>    | 6  | 9  | 8  | 17 | 0.9714794 |
| <i>WNK1</i>     | 6  | 4  | 3  | 7  | 0.9762689 |
| <i>MOXD1</i>    | 3  | 5  | 4  | 9  | 0.9895341 |

(£) P-values were obtained using a dominant genetic mode of inheritance with adjustment on the 3 first principal component to take into account population structure.

**Supplementary Table 3. Distribution of carriers and characteristics of *ENG* candidate coding variants (CCVs) in patients of the discovery cohort (N=88) and the French replication cohort (N=161).**

| <i>ENG</i> CCVs | rs id       | ref | alt | Discovery cohort |                  |                       |                  | French replication cohort |                  |                       |                  | GnomAD                 |        | CADD score v1.3 |
|-----------------|-------------|-----|-----|------------------|------------------|-----------------------|------------------|---------------------------|------------------|-----------------------|------------------|------------------------|--------|-----------------|
|                 |             |     |     | No fibrosis n=40 |                  | Severe fibrosis, n=48 |                  | No fibrosis, n=102        |                  | Severe fibrosis, n=59 |                  | (European)             | MAF    |                 |
|                 |             |     |     | carriers (%)     | MAF <sup>a</sup> | carriers (%)          | MAF <sup>a</sup> | carriers (%)              | MAF <sup>a</sup> | carriers (%)          | MAF <sup>a</sup> | %carriers <sup>b</sup> |        |                 |
| p.Thr5Met       | rs35400405  | G   | A   | 0 (0%)           | 0                | 4 (8.3%)              | 0.042            | 4 (3.9%)                  | 0.020            | 6 (10.2%)             | 0.051            | 4.1%                   | 0.021  | 3.86            |
| p.Pro131Leu     | rs139398993 | G   | A   | 0 (0%)           | 0                | 1 (2.1%)              | 0.010            | -                         | -                | -                     | -                | 0.3%                   | 0.001  | 6.64            |
| p.Gly191Asp     | rs41322046  | C   | T   | 0 (0%)           | 0                | 2 (4.2%)              | 0.021            | 3 (2.94%)                 | 0.015            | 1 (1.7%)              | 0.008            | 3.1%                   | 0.016  | 23.9            |
| p.Gly545Ser     | rs142896669 | C   | T   | -                | -                | -                     | -                | 1 (0.98%)                 | 0.005            | 0 (0%)                | 0                | 0.1%                   | 0.0005 | 29.9            |
| p.Arg571His     | rs138799379 | C   | T   | -                | -                | -                     | -                | 1 (0.98%)                 | 0.005            | 0 (0%)                | 0                | 0.02%                  | 0.0001 | 20.7            |
| p.Ser615Leu     | rs148002300 | G   | A   | -                | -                | -                     | -                | 1 (0.98%)                 | 0.005            | 0 (0%)                | 0                | 0.05%                  | 0.002  | 22.8            |

<sup>a</sup> Minor allele frequency. As all carriers in the discovery cohort and in the French replication cohort were heterozygous the MAF is half of the proportion of carriers.

<sup>b</sup> In the GnomAD public database including > 50,000 Europeans, 26 homozygous were reported for p.Thr5Met, 1 for p.Pro131Leu, 8 for p.Gly191Asp and none for the other *ENG* CCVs.

## References

- Belkadi, A., Pedergnana, V., Cobat, A., Itan, Y., Vincent, Q.B., Abhyankar, A., et al. (2016). Whole-exome sequencing to analyze population structure, parental inbreeding, and familial linkage. *Proc Natl Acad Sci U S A* 113(24), 6713-6718. doi: 10.1073/pnas.1606460113.
